# Supplementary material for: Optimisation of Catalytic Oxidation Conditions for the 2-Keto-L-Gulonic Acid Production Using Response Surface Methodology
Source: Research Square preprint supplement (doi:10.21203/rs.3.rs-2786108/v1), 2023-04-11
Supplement: Supplementary file 2 [file 8b18363859c3525bd1366a59.docx]

**Highlights**

- The highest 2-KLG conversion yield is achieved as 49.95%
- The optimum 2-KLG production conditions are 41.30°C, 8.23 pH and 3.25 h reaction time
- The increasing oxidation time and temperature has negative effect in 2-KLG production
