# Supplementary figures and images for: Optimisation of Catalytic Oxidation Conditions for the 2-Keto-L-Gulonic Acid Production Using Response Surface Methodology
Source: Research Square preprint supplement (doi:10.21203/rs.3.rs-2786108/v1), 2023-04-11

## Graphical Abstract

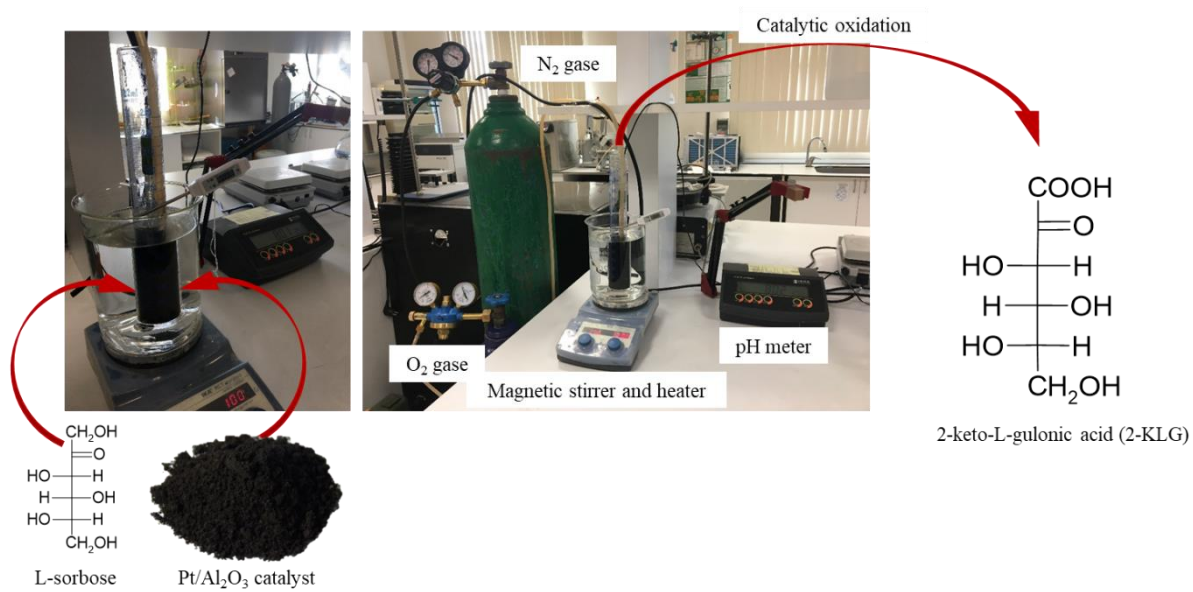

Supplement: Supplementary file 1 [file 8297d49bab410a21ceec70ea.pdf]
